# Supplementary material for: Growth Stages and Inter-Species Gut Microbiota Composition and Function in Captive Red Deer (Cervus elaphus alxaicus) and Blue Sheep (Pseudois nayaur)
Source: MDPI journal article supplement (doi:10.3390/ani13040553), 2023-02-04
Supplement: s1 [file s1]

# Developmental Stages Influence Gut Microbiota Composition and Function of Captive Red Deer (*Cervus elaphus alxaicus*) and Blue Sheep (*Pseudois nayaur*)

Yao Zhao <sup>1</sup>, Jia Sun <sup>2</sup>, Mengqi Ding <sup>3</sup>, Romaan Hayat Khattak <sup>1,4</sup>, Liwei Teng

<sup>1,5,\*</sup> and Zhensheng Liu<sup>1,5,\*</sup>

<sup>1</sup>College of Wildlife and Protected Areas, Northeast Forestry University,

Harbin 150040, China

<sup>2</sup> Liaoning Wildlife Protection and Epidemic Disease Monitoring Center,

Dalian 116013, China

<sup>3</sup> State Key Laboratory of Urban Water Resource and Environment, School of Environment, Harbin Institute of Technology, Harbin 150090, China

<sup>4</sup> Institute of Zoology, Guangdong Academy of Sciences, Guangzhou

510260, China

<sup>5</sup> Key Laboratory of Conservation Biology, National Forestry and

Grassland Administration, Harbin 150090, China

\* Correspondence: tenglw1975@163.com (L.W.T.); zhenshengliu@163.com

(Z.S.L.)

**Table S1.** Sampling animal information

| Sample ID | Sex    | Growth stage | Weight (kg) | Age (year) |
|-----------|--------|--------------|-------------|------------|
| ML1       | Male   | Adult        | 150         | 10         |
| ML2       | Male   | Adult        | 140         | 8          |
| ML3       | Male   | Adult        | 130         | 5          |
| ML4       | Male   | Adult        | 120         | 4          |
| ML5       | Male   | Adult        | 150         | 7          |
| ML6       | Female | Adult        | 100         | 9          |
| ML7       | Female | Adult        | 105         | 8          |
| ML8       | Female | Adult        | 125         | 6          |
| ML9       | Female | Adult        | 130         | 8          |
| ML10      | Female | Adult        | 120         | 4          |
| ML1-y     | Male   | Juvenile     | 70          | 2          |
| ML2-y     | Male   | Juvenile     | 65          | 2          |
| ML3-y     | Male   | Juvenile     | 65          | 2          |
| ML4-y     | Female | Juvenile     | 65          | 2          |
| ML5-y     | Female | Juvenile     | 65          | 2          |
| ML6-y     | Female | Juvenile     | 65          | 2          |
| YY1       | Male   | Adult        | 30          | 9          |
| YY2       | Male   | Adult        | 30          | 5          |
| YY3       | Male   | Adult        | 22.5        | 4          |
| YY4       | Male   | Adult        | 22.5        | 3          |
| YY5       | Male   | Adult        | 20          | 12         |
| YY6       | Female | Adult        | 21          | 11         |
| YY7       | Female | Adult        | 20          | 10         |
| YY8       | Female | Adult        | 20.5        | 5          |
| YY9       | Female | Adult        | 19          | 3          |
| YY10      | Female | Adult        | 15          | 1.3        |
| YY1-y     | Male   | Juvenile     | 9           | 1.3        |
| YY2-y     | Male   | Juvenile     | 9           | 1.3        |
| YY3-y     | Male   | Juvenile     | 9           | 0.3        |
| YY4-y     | Female | Juvenile     | 8.5         | 0.3        |
| YY5-y     | Female | Juvenile     | 8.5         | 0.3        |
| YY6-y     | Female | Juvenile     | 8           | 0.3        |

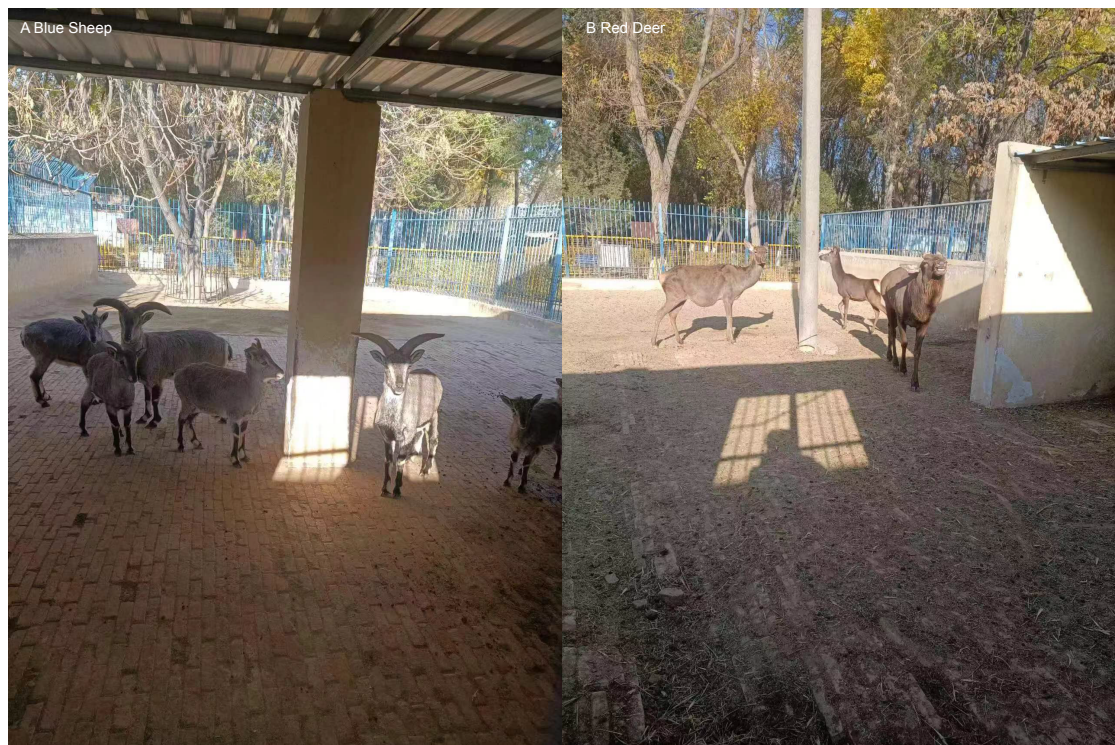

**Figure S1.** The living environment of blue sheep (A) and red deer (B) in different growth stages.

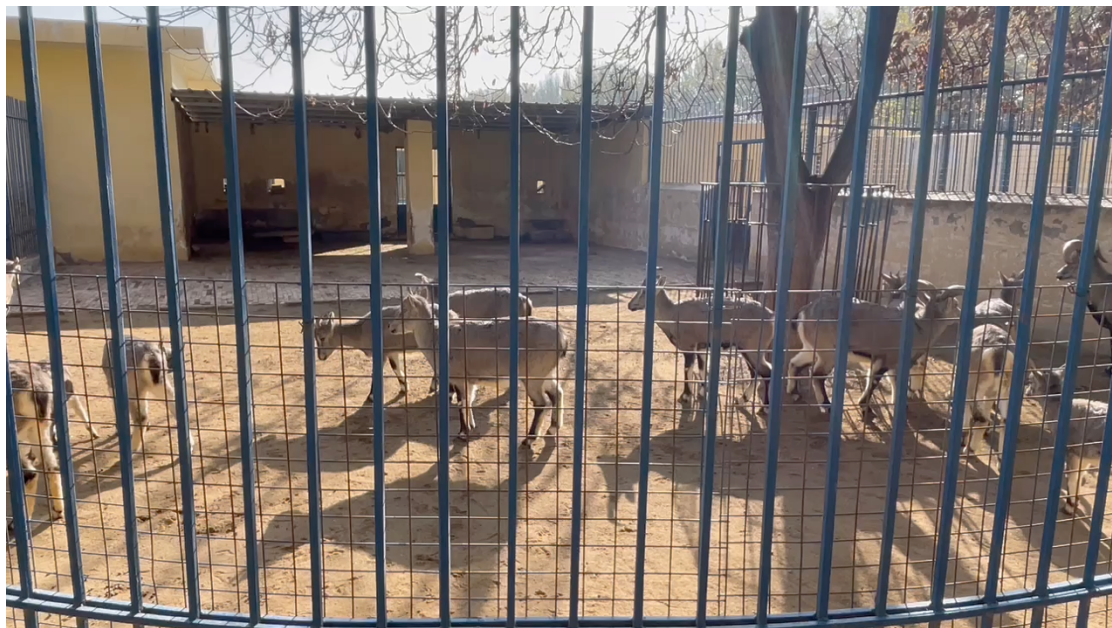

**Video S1.** Blue sheep in the semi-enclosed environment of Zhongshan Park, China.

**Table S2.** Statistical table of sequencing quantity of sample

| Red Deer | Sequencing quantity | Effective sequencing quantity | Blue Sheep | Sequencing quantity | Effective sequencing quantity |
|----------|---------------------|-------------------------------|------------|---------------------|-------------------------------|
| ML1      | 75939               | 75463                         | YY1        | 70509               | 70002                         |
| ML2      | 58924               | 58784                         | YY2        | 77965               | 77663                         |
| ML3      | 79273               | 78944                         | YY3        | 89270               | 88662                         |
| ML4      | 77734               | 77376                         | YY4        | 78511               | 78012                         |
| ML5      | 73570               | 72778                         | YY5        | 87868               | 86885                         |
| ML6      | 66538               | 65677                         | YY6        | 74404               | 74017                         |
| ML7      | 56697               | 56304                         | YY7        | 71962               | 71322                         |
| ML8      | 69223               | 68756                         | YY8        | 64170               | 63812                         |
| ML9      | 81108               | 80599                         | YY9        | 69904               | 69278                         |
| ML10     | 81752               | 81329                         | YY10       | 83361               | 82812                         |
| ML1-y    | 79750               | 79070                         | YY1-y      | 78713               | 77946                         |
| ML2-y    | 67034               | 66643                         | YY2-y      | 64476               | 63936                         |
| ML3-y    | 61477               | 61173                         | YY3-y      | 75641               | 75188                         |
| ML4-y    | 75476               | 75015                         | YY4-y      | 92502               | 91461                         |
| ML5-y    | 80991               | 80590                         | YY5-y      | 75926               | 75345                         |
| ML6-y    | 74566               | 74260                         | YY6-y      | 89109               | 88771                         |

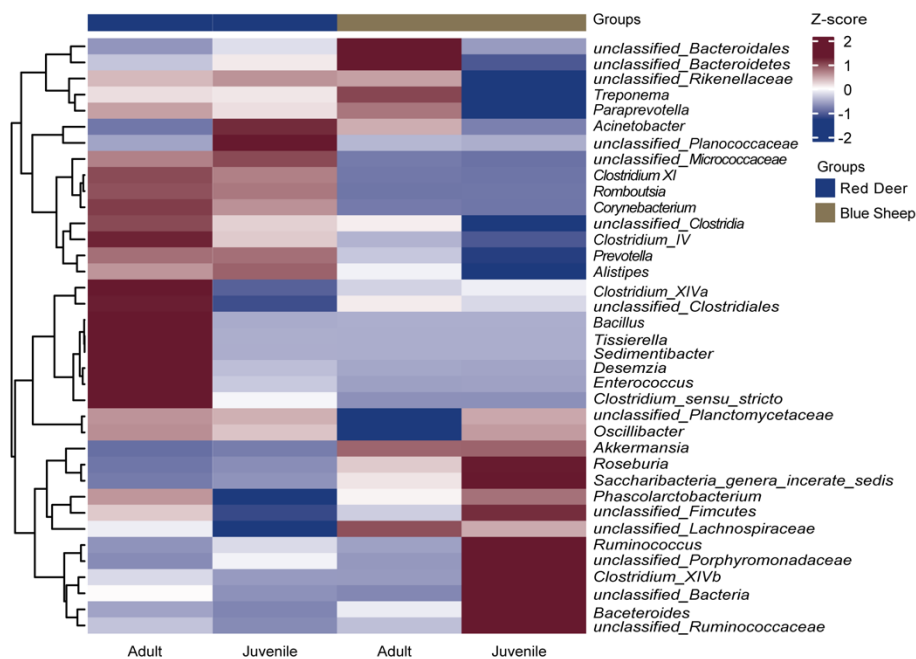

**Figure S2.** Ranking of the abundance of the top 37 bacterial genera in the gut microbiota of captive blue sheep and red deer based on a Bray-Curtis dissimilarity



heatmap. The relative percentage of each bacterial genus (variable clustered on the y-axis) in each sample is primarily depicted.

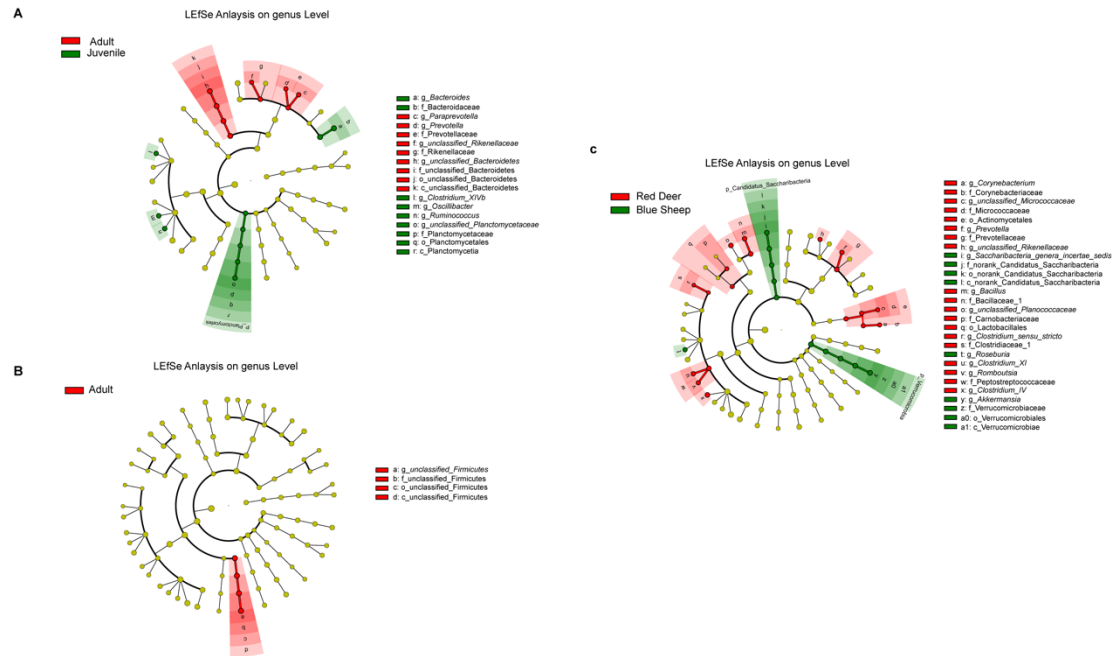

**Figure S3.** Taxonomic cladogram indicating the phylogenetic distribution of microbial lineages associated with each group. In each group, the difference is indicated by a unique color. Circles represent the phylogenetic level from phylum to genus (OTUs) from the inside out, and the diameter of each circle is proportional to the abundance of taxon. **(A)** Juvenile and adult blue sheep; **(B)** Juvenile and adult red deer; **(C)** Blue sheep and red deer.
